# Supplementary material for: Core−shell GaP@C nanoparticles with a thin and uniform carbon coating as a promising anode material for rechargeable lithium-ion batteries
Source: Royal Society of Chemistry journal article supplement (doi:10.1039/d0dt04166a), 2020-12-21
Supplement: d0dt04166a1.pdf [file d0dt04166a1.pdf]

## Supporting Information

### Core-shell GaP@C nanoparticles with thin and uniform carbon coating as a promising anode material for rechargeable lithium-ion batteries

Jingjing Ma<sup>\*a,b</sup>, Huan Zhang<sup>b</sup>, Yucheng Xin<sup>b</sup>, Shanqin Liu<sup>b</sup>, Yuanchao Li<sup>a,b</sup>, Li Yang<sup>b</sup>, Guangri Xu<sup>\*a,b</sup>, Tianjun Lou<sup>b</sup>, Hongying Niu<sup>b</sup> and Shuting Yang<sup>c</sup>

<sup>a</sup> Postdoctoral Research Base, Henan Institute of Science and Technology, Xinxiang, 453003, P. R. China.

<sup>b</sup> School of Chemistry and Chemical Engineering, Henan Institute of Science and Technology, Xinxiang, 453003, P. R. China.

<sup>c</sup> School of Chemistry and Chemical Engineering, Henan Normal University, Xinxiang, 453003, P. R. China.

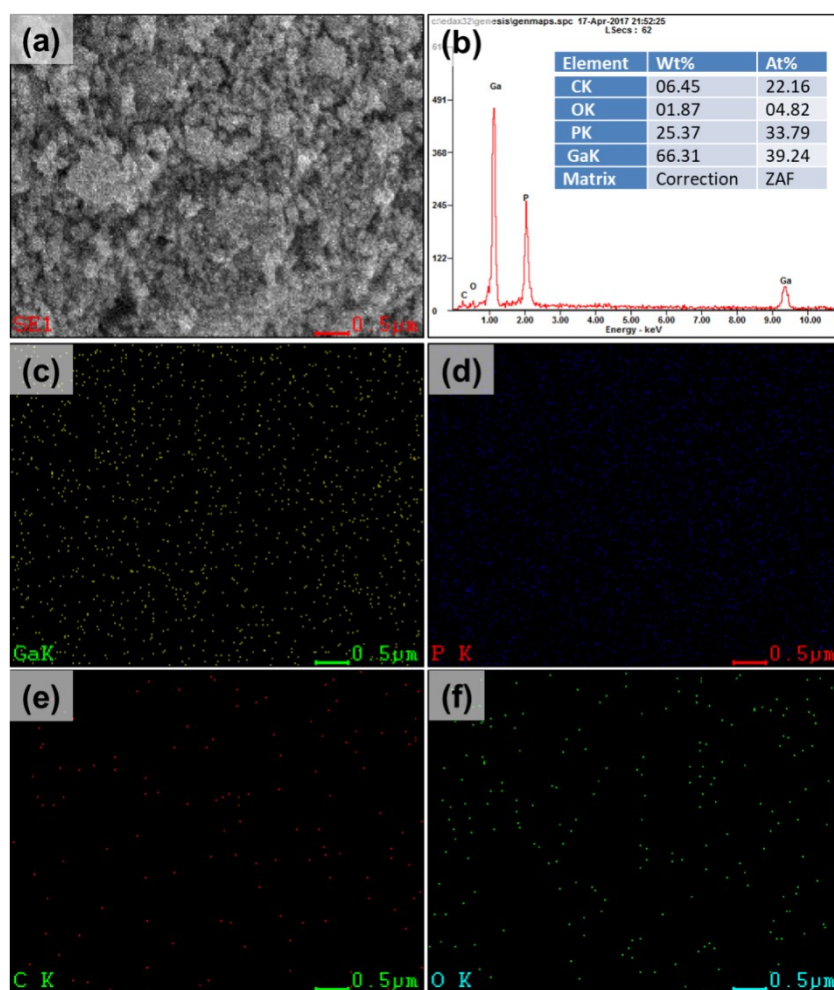

Figure S1 (a) SEM image of GaP@C, (b) EDX result and (c-f) elemental mapping of GaP@C composite.

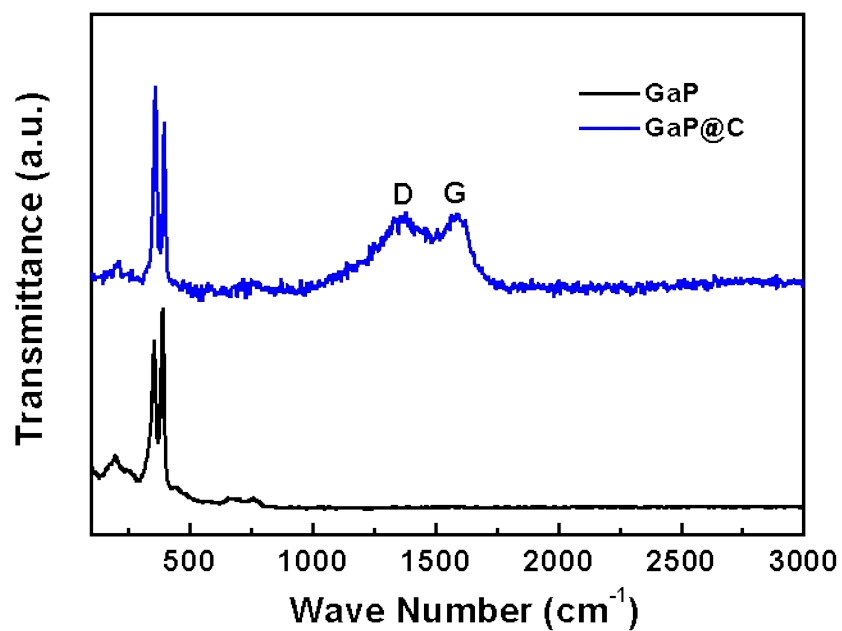

Figure S2 Raman spectra of GaP and GaP@C composite.

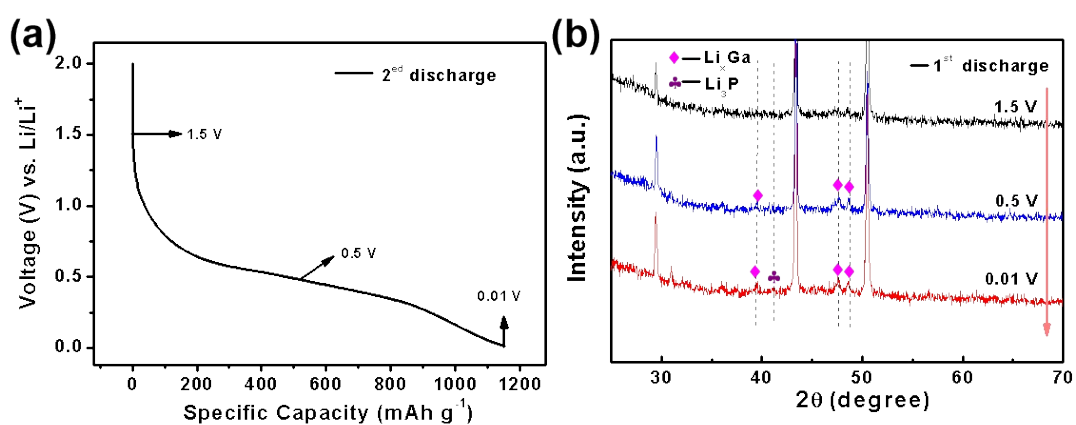

Figure S3 Discharge curve (a) of GaP@C at 2<sup>nd</sup> cycle and the ex-situ XRD patterns of GaP@C at different 2<sup>nd</sup> discharge potentials

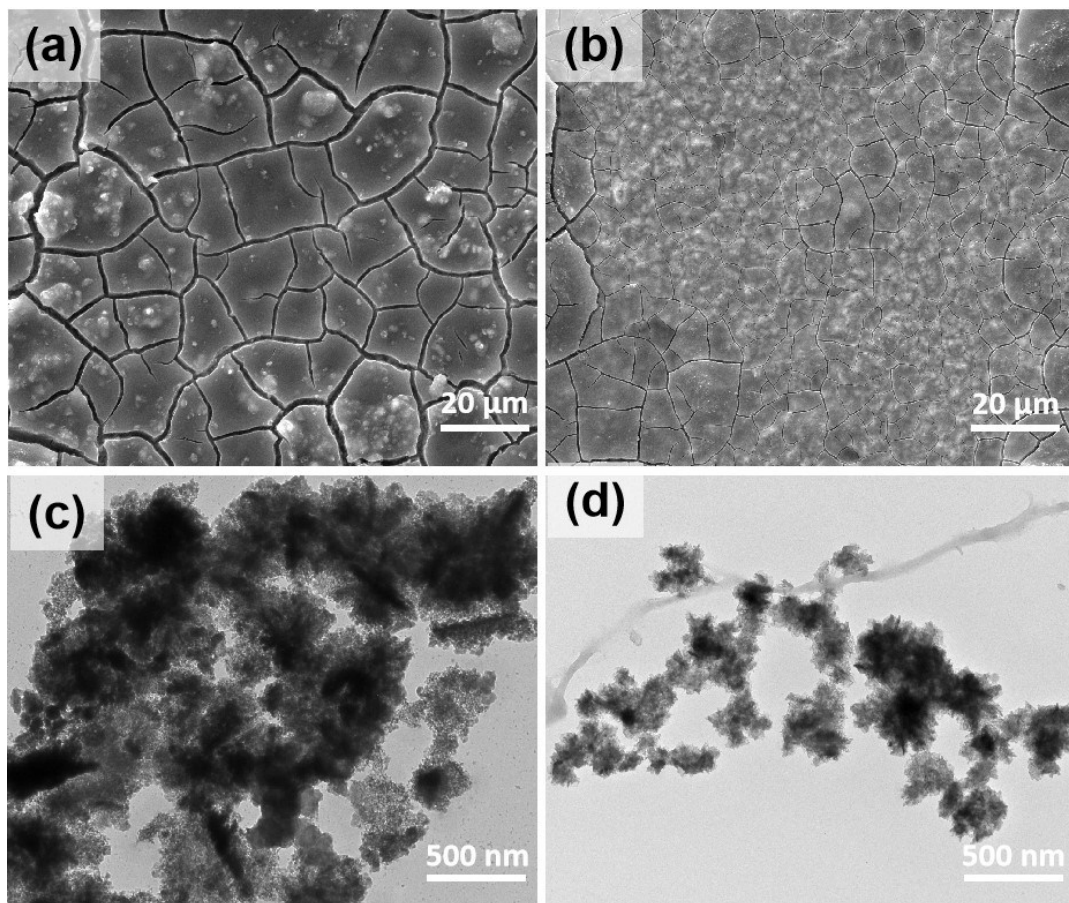

Figure S4 SEM(a, b) and TEM(c, d) images of GaP and GaP@C electrodes after 50 cycles.

Table S1 Recent progress on materials synthesis and electrochemical performance of  
TMPs anode for LIBs.

| materials                                | rate                  | cycles | reversible capacity<br>(mAh g <sup>-1</sup> ) | Ref       |
|------------------------------------------|-----------------------|--------|-----------------------------------------------|-----------|
| FeP@C                                    | 0.1C                  | 70     | 609                                           | [1]       |
| FeP@C@rGO                                | 0.1C                  | 100    | 586                                           | [2]       |
| Mn <sub>1-x</sub> FexP                   | 0.1 A g <sup>-1</sup> | 40     | 506                                           | [3]       |
| Sn <sub>4</sub> P <sub>3</sub> /graphite | 0.1 A g <sup>-1</sup> | 100    | 651                                           | [4]       |
| V <sub>4</sub> P <sub>7</sub>            | 0.1 A g <sup>-1</sup> | 50     | 508                                           | [5]       |
| NiP <sub>3</sub>                         | 0.1C                  | 50     | 434                                           | [6]       |
| GaP                                      | 0.5A g <sup>-1</sup>  | 60     | 305                                           | This work |
| GaP@C                                    | 0.5A g <sup>-1</sup>  | 100    | 832                                           | This work |

## References

- [1] F. Yang, H. Gao, J. Hao, S. Zhang, P. Li, Y. Liu, J. Chen, Z. Guo, *Advanced Functional Materials*, 29 (2019) 1808291.
- [2] X. Wang, K. Chen, G. Wang, X. Liu, H. Wang, *ACS nano*, 11 (2017) 11602-11616.
- [3] K.-H. Kim, W.-S. Kim, S.-H. Hong, *Nanoscale*, 11 (2019) 13494-13501.
- [4] Y. Ding, Z.F. Li, E.V. Timofeeva, C.U. Segre, *Advanced Energy Materials*, 8 (2018) 1702134.
- [5] K.-H. Kim, C.-H. Jung, W.-S. Kim, S.-H. Hong, *Journal of Power Sources*, 400 (2018) 204-211.
- [6] Y. Lu, J.-p. Tu, Q.-q. Xiong, Y.-q. Qiao, X.-l. Wang, C.-d. Gu, S.X. Mao, *RSC advances*, 2 (2012) 3430-3436.
